# Supplementary material for: Siglec-7 May Limit Natural Killer Cell–mediated Antitumor responses in Bladder Cancer Patients
Source: PubMed Central journal article supplement — Eur Urol Open Sci. 2021 Nov 18;34:79–82. doi: 10.1016/j.euros.2021.10.001 (PMC8605422; doi:10.1016/j.euros.2021.10.001), 2021-11-18
Supplement: mmc2.pdf [file mmc2.pdf]

Supplementary Figure 1

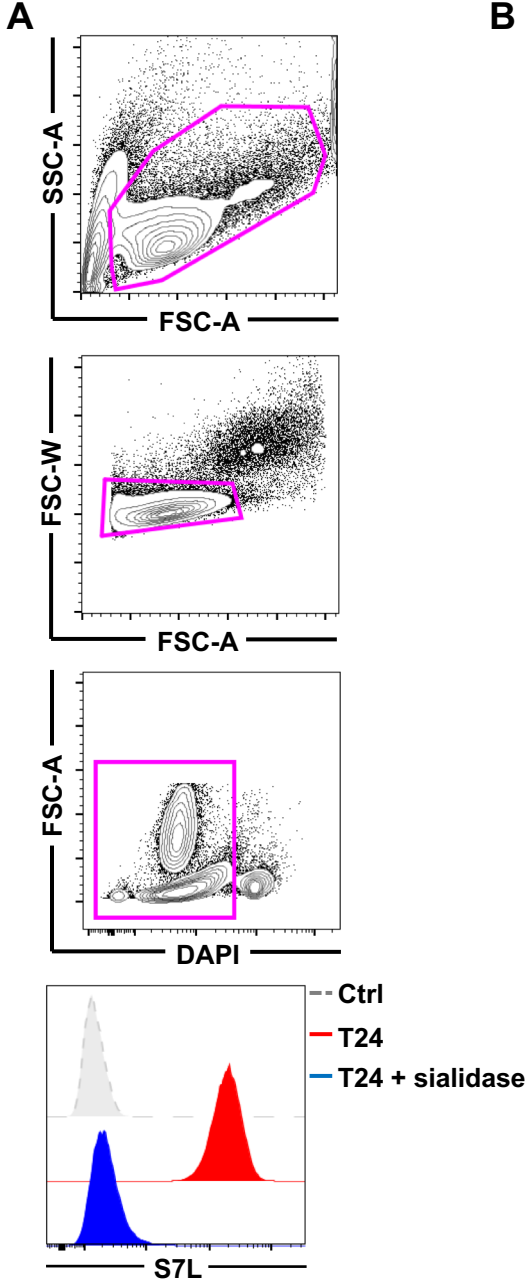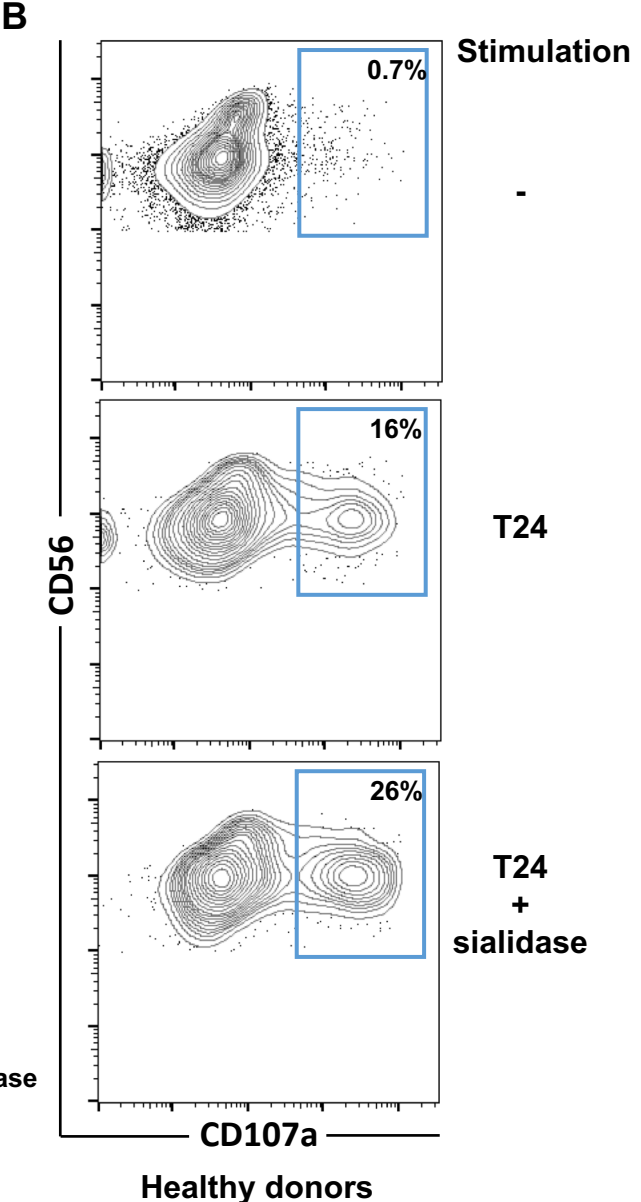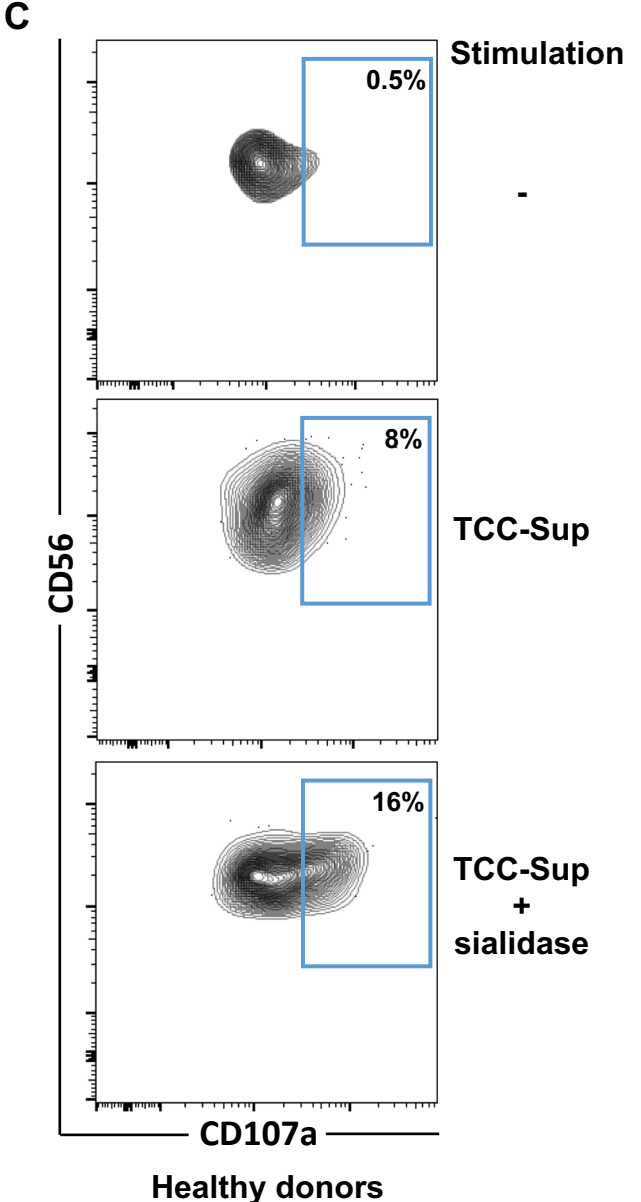

Supplementary Figure 2

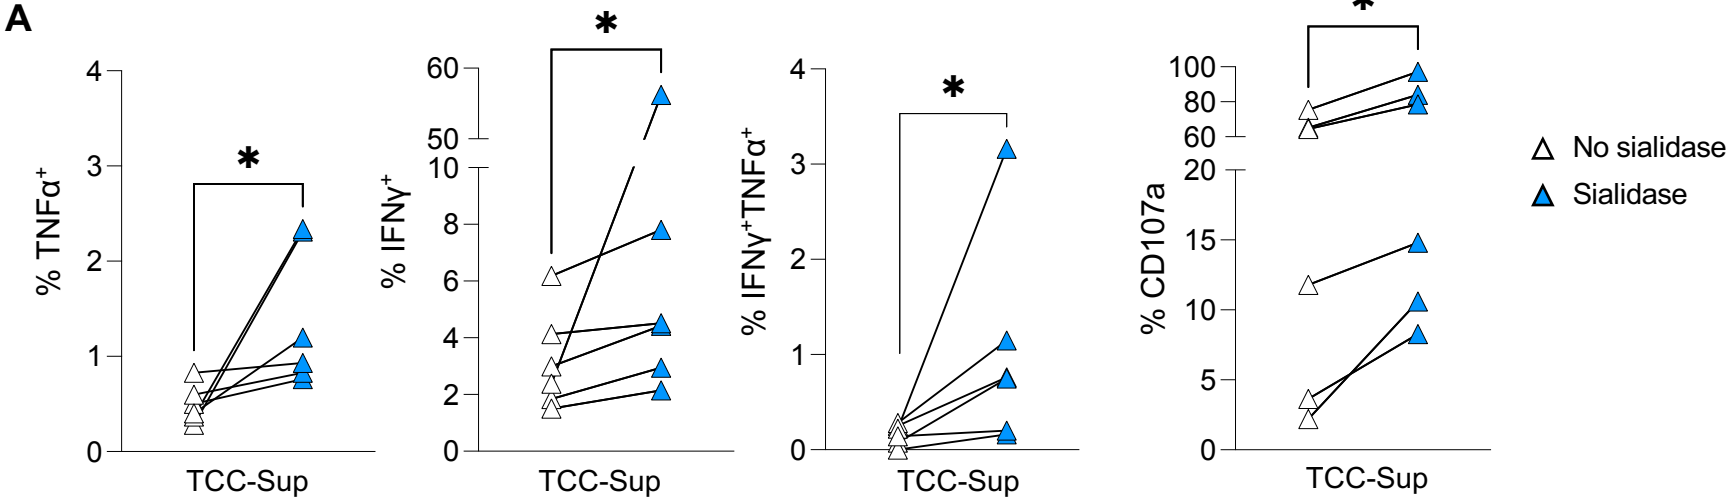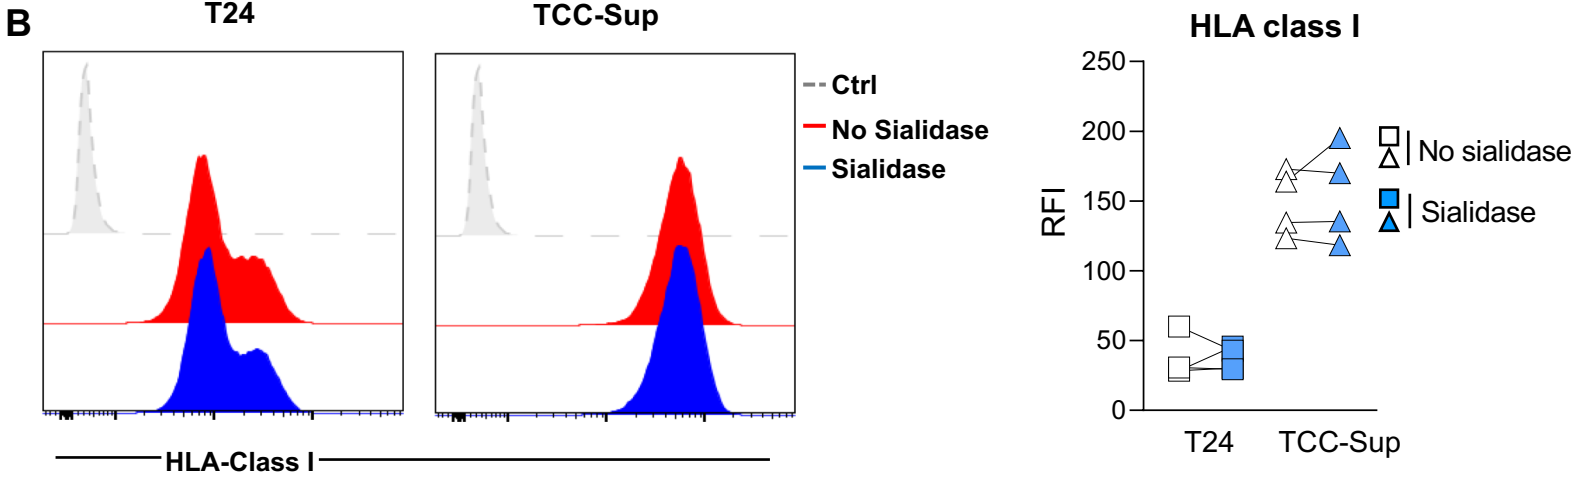

Supplementary Figure 3

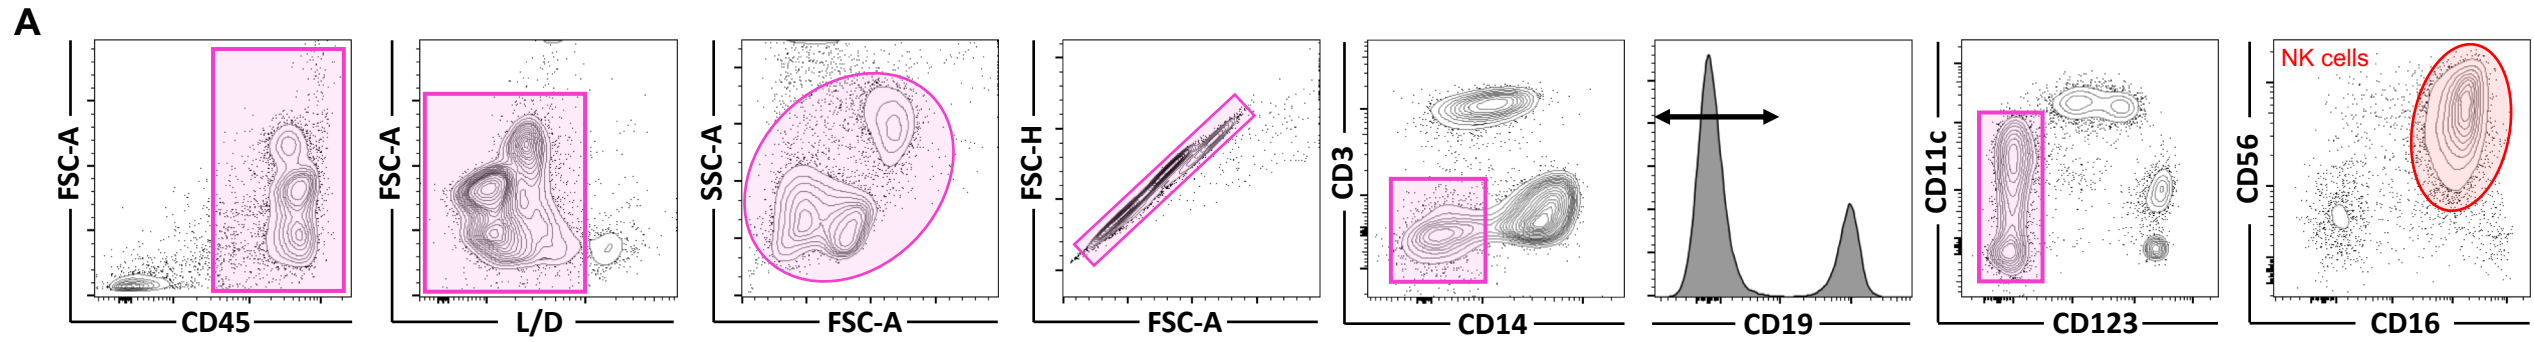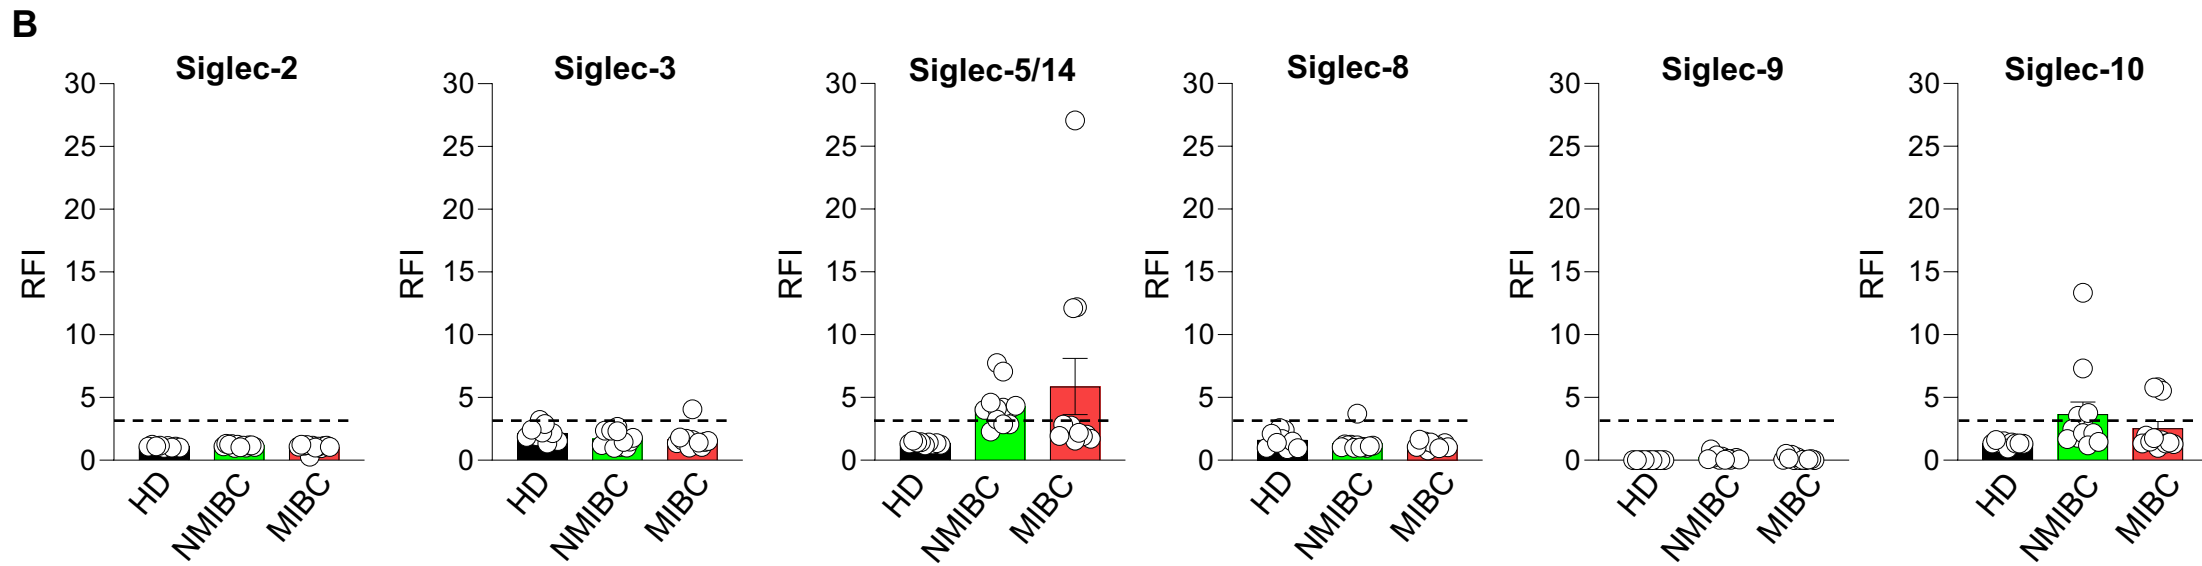

Supplementary Figure 4

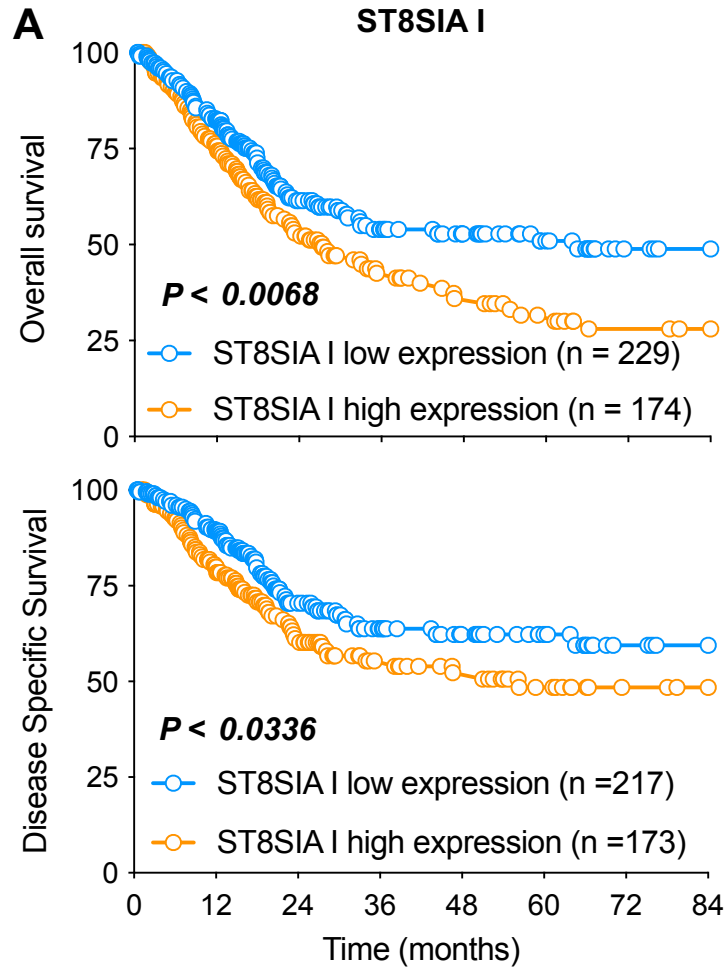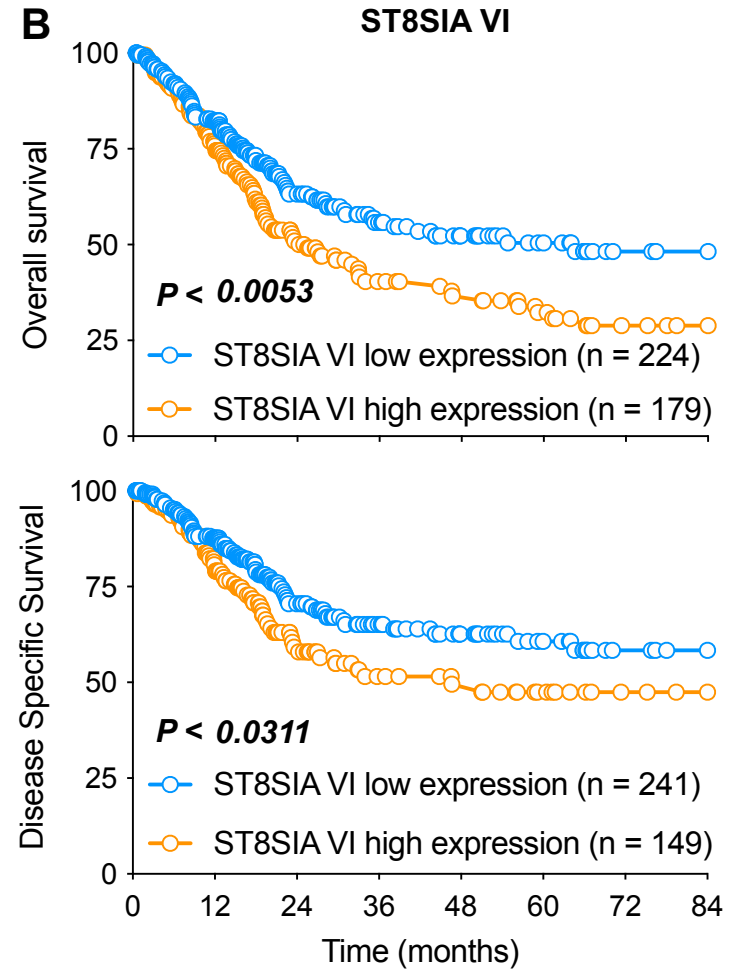

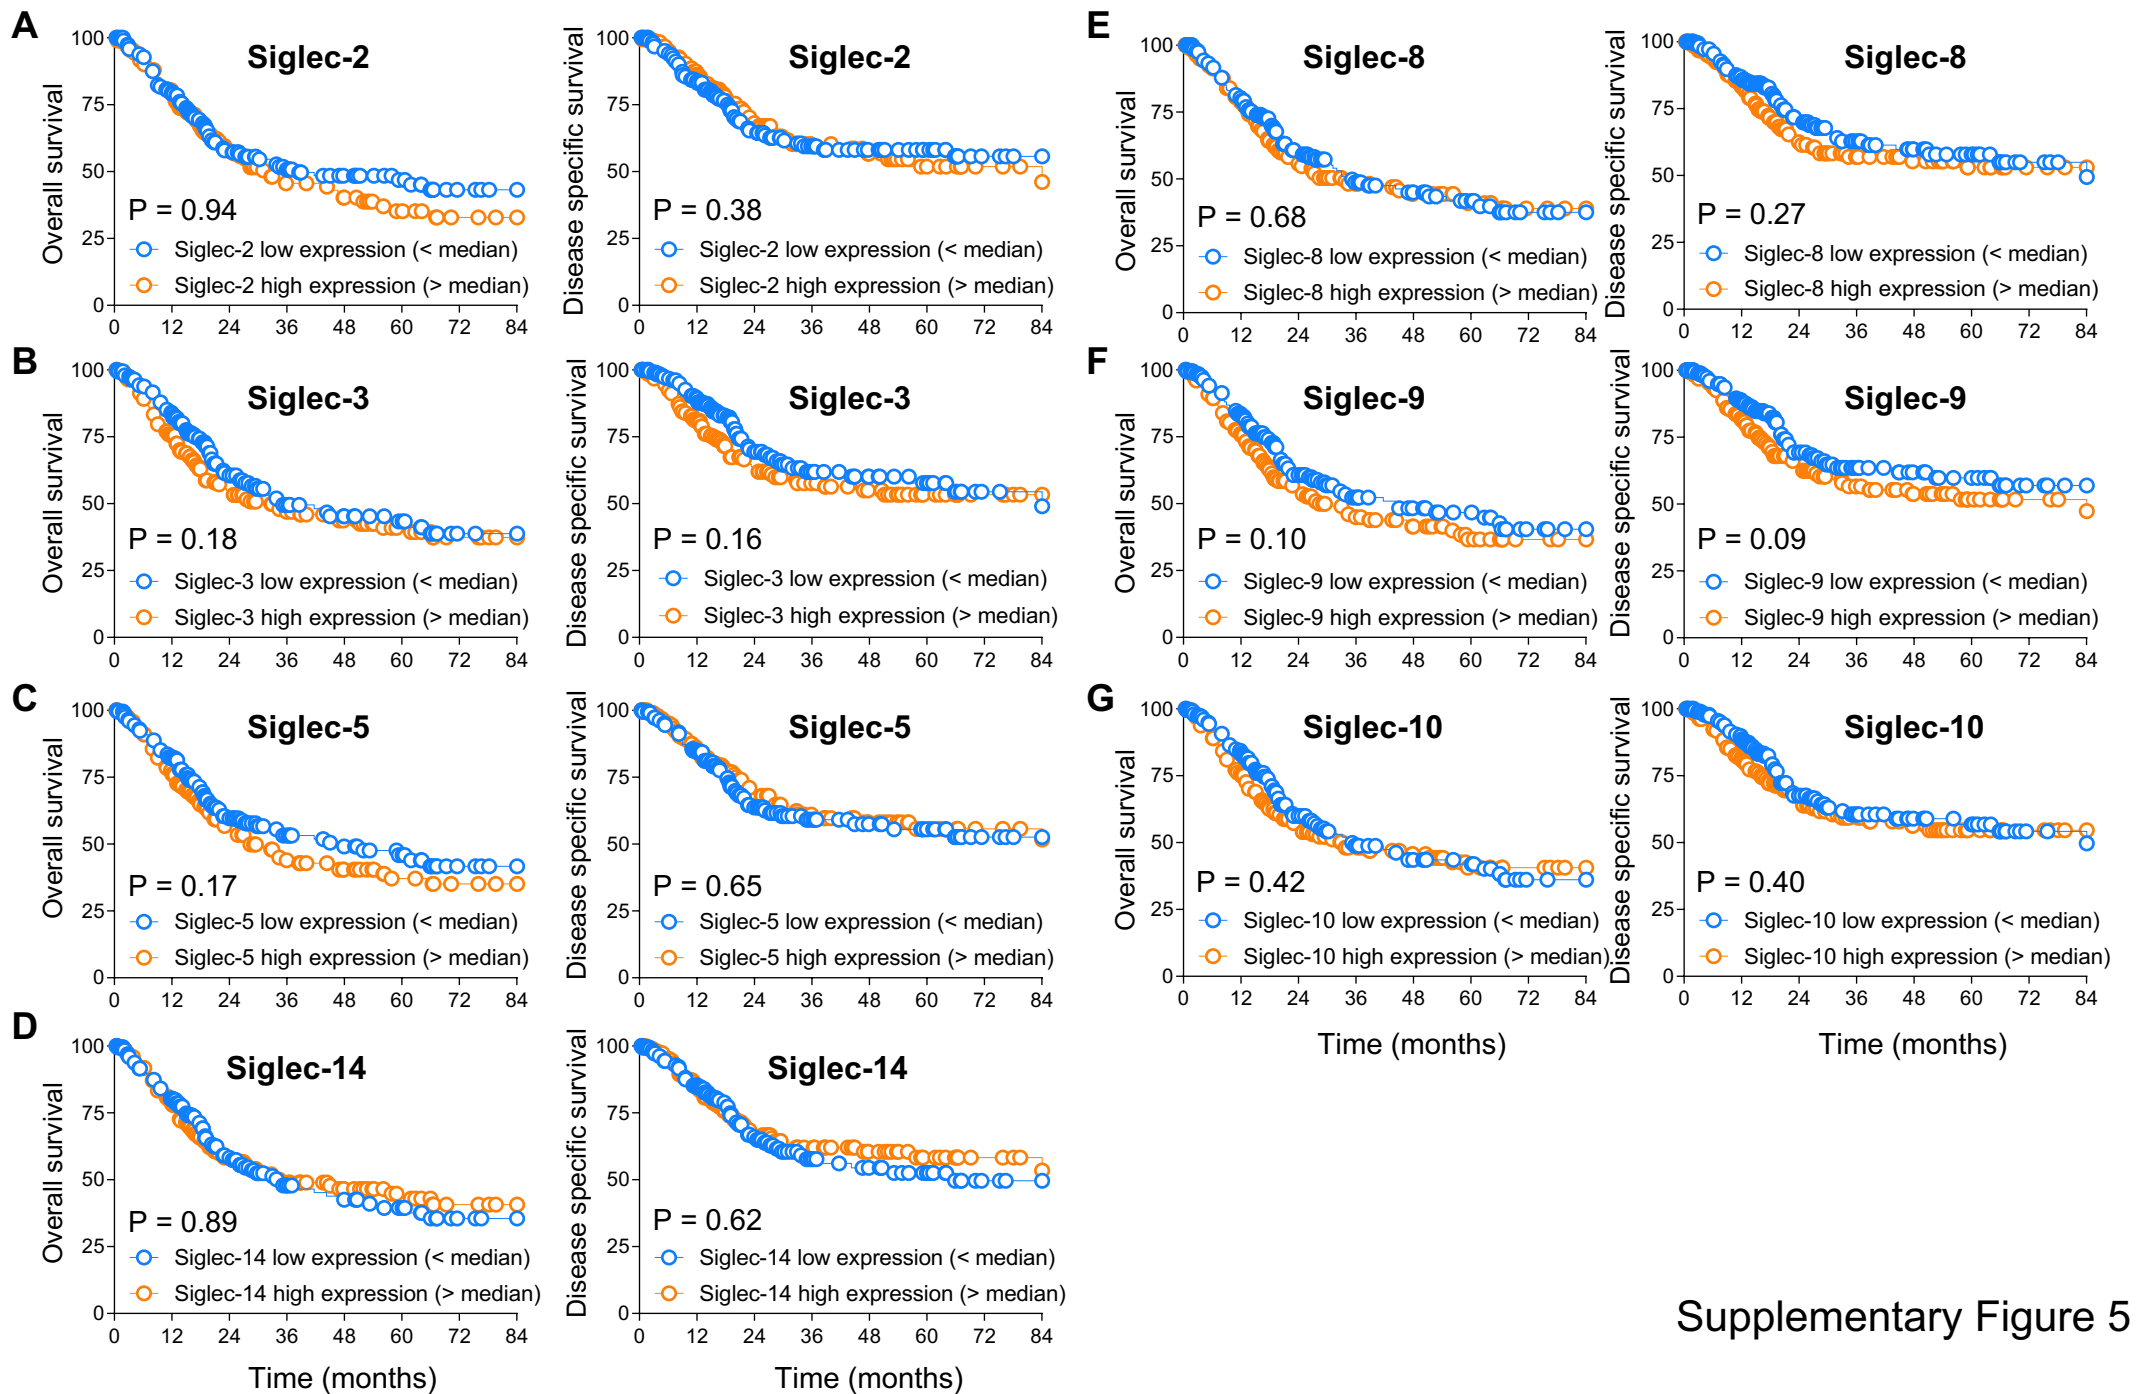

Supplementary Figure 5
